# Supplementary material
Source: PubMed Central journal article supplement (PMC3562098)
Supplement: JB.02051-12_zjb999092424so1.pdf [file JB.02051-12_zjb999092424so1.pdf]

**Supplemental Material:**

**Identification of a target gene and activating stimulus for the YpdA/YpdB histidine kinase/response regulator system in *Escherichia coli***

Luitpold Fried<sup>1#</sup>, Stefan Behr<sup>1#</sup>, and Kirsten Jung<sup>1\*</sup>

<sup>1</sup>Munich Center for Integrated Protein Science (CIPSM) at the Department of Microbiology,  
Ludwig-Maximilians-Universität München, 82152 Martinsried, Germany

# These authors contributed equally to this work

**Running title:** The YpdA/YpdB-system in *E. coli*

\*To whom correspondence should be addressed:

Dr. Kirsten Jung

Ludwig-Maximilians-Universität München

Department Biologie I, Bereich Mikrobiologie

Großhaderner Str. 2-4

82152 Martinsried

Germany

Phone: +49-89-2180-74500

Fax: +49-89-2180-74520

E-mail: [jung@lmu.de](mailto:jung@lmu.de)

TABLE S1. Plasmids used in this study.

| Plasmid                             | Description                                                                                                                          | Reference or source |
|-------------------------------------|--------------------------------------------------------------------------------------------------------------------------------------|---------------------|
| pRed/ET                             | $\lambda$ -RED recombinase in pBAD24; Amp <sup>r</sup>                                                                               | Gene Bridges        |
| pCP20                               | FLP-recombinase, $\lambda$ cl 857 <sup>+</sup> , $\lambda$ pR Rep <sup>ts</sup> ; Amp <sup>r</sup> , Cm <sup>r</sup>                 | (1)                 |
| pBAD33-Cm                           | Arabinose-inducible P <sub>BAD</sub> promoter, pBR322 ori; Kan <sup>r</sup>                                                          | (2)                 |
| pBAD33- <i>ypdB</i>                 | <i>6his-ypdB</i> cloned in the AflII and XbaI sites of pBAD33-Cm; Cm <sup>r</sup>                                                    | This work           |
| pBAD24                              | Arabinose-inducible P <sub>BAD</sub> promoter, pBR322 ori; Amp <sup>r</sup>                                                          | (2)                 |
| pBAD24- <i>ypdB</i>                 | <i>6his-ypdB</i> cloned in the EcoRI and XbaI sites of pBAD24; Amp <sup>r</sup>                                                      | This work           |
| pBAD24- <i>ypdB</i> D53E            | <i>ypdB</i> D54E cloned in the NdeI and XbaI sites of pBAD24- <i>ypdB</i> ; Amp <sup>r</sup>                                         | This work           |
| pBAD24- <i>ypdB</i> D53N            | <i>ypdB</i> D54N cloned in the NdeI and XbaI sites of pBAD24- <i>ypdB</i> ; Amp <sup>r</sup>                                         | This work           |
| pBAD24- <i>yehS</i>                 | <i>yehS</i> cloned in the NdeI and XbaI sites of pBAD24- <i>kdpE</i> ; Amp <sup>r</sup>                                              | This work           |
| pBAD24- <i>ypdA</i>                 | <i>ypdA</i> cloned in the EcoRI and XbaI sites of pBAD24; Amp <sup>r</sup>                                                           | This work           |
| pBAD24- <i>ypdA</i> H371Q           | <i>ypdA</i> H371Q cloned in the EcoRI and XbaI sites of pBAD24; Amp <sup>r</sup>                                                     | This work           |
| pBAD24- <i>yhjX</i>                 | <i>yhjX-6his</i> cloned in the EcoRI and XbaI sites of pBAD24; Amp <sup>r</sup>                                                      | This work           |
| pBAD24- <i>ypdAB</i>                | <i>ypdAB</i> cloned in the EcoRI and XbaI sites of pBAD24; Amp <sup>r</sup>                                                          | This work           |
| pBAD24- <i>ypdABC</i>               | <i>ypdABC</i> cloned in the EcoRI and XbaI sites of pBAD24; Amp <sup>r</sup>                                                         | This work           |
| pUC19                               | IPTG-inducible P <sub>Lac</sub> promoter, pMB1 ori, Amp <sup>r</sup>                                                                 | (3)                 |
| pUC19 P <sub>YjiY</sub> -212/+88    | P <sub>YjiY</sub> -212/+88 cloned in the EcoRI and BamHI sites of pUC19; Amp <sup>r</sup>                                            | (4)                 |
| pUC19 P <sub>YhjX</sub> -264/+36    | P <sub>YhjX</sub> -264/+36 cloned in the EcoRI and BamHI sites of pUC19; Amp <sup>r</sup>                                            | This work           |
| pUC19 P <sub>YhjX</sub> -264/-165   | P <sub>YhjX</sub> -264/-165 cloned in the EcoRI and BamHI sites of pUC19; Amp <sup>r</sup>                                           | This work           |
| pUC19 P <sub>YhjX</sub> -164/-65    | P <sub>YhjX</sub> -164/-65 cloned in the EcoRI and BamHI sites of pUC19; Amp <sup>r</sup>                                            | This work           |
| pUC19 P <sub>YhjX</sub> -64/+36     | P <sub>YhjX</sub> -64/+36 cloned in the EcoRI and BamHI sites of pUC19; Amp <sup>r</sup>                                             | This work           |
| pRS415                              | Operon fusion vector                                                                                                                 | (5)                 |
| pRS415 P <sub>YhjX</sub> -264/+36   | P <sub>YhjX</sub> -264/+36 cloned in the EcoRI and BamHI sites of pRS415; Amp <sup>r</sup>                                           | This work           |
| pRS415 P <sub>YhjX</sub> up_rplmt   | P <sub>YhjX</sub> up_rplmt (replacement of 15 bp upstream of M1) cloned in the EcoRI and BamHI sites of pRS415; Amp <sup>r</sup>     | This work           |
| pRS415 P <sub>YhjX</sub> M1         | P <sub>YhjX</sub> M1 (replacement of M1) cloned in the EcoRI and BamHI sites of pRS415; Amp <sup>r</sup>                             | This work           |
| pRS415 P <sub>YhjX</sub> spacer     | P <sub>YhjX</sub> spacer (replacement of spacer) cloned in the EcoRI and BamHI sites of pRS415; Amp <sup>r</sup>                     | This work           |
| pRS415 P <sub>YhjX</sub> M2         | P <sub>YhjX</sub> M2 (replacement of M2) cloned in the EcoRI and BamHI sites of pRS415; Amp <sup>r</sup>                             | This work           |
| pRS415 P <sub>YhjX</sub> down_rplmt | P <sub>YhjX</sub> down_rplmt (replacement of 15 bp downstream of M2) cloned in the EcoRI and BamHI sites of pRS415; Amp <sup>r</sup> | This work           |
| pRS415 P <sub>YhjX</sub> M2S1       | P <sub>YhjX</sub> M2S1 (replacement of bp 1 and 10 in M2) cloned in the EcoRI and                                                    | This work           |

|                               |                                                                                                                                            |           |
|-------------------------------|--------------------------------------------------------------------------------------------------------------------------------------------|-----------|
|                               | BamHI sites of pRS415; Amp <sup>r</sup>                                                                                                    |           |
| pRS415 P <sub>yhjX M2S2</sub> | P <sub>yhjX M2S2</sub> (replacement of bp 1,2,9 and 10 in M2) cloned in the EcoRI and BamHI sites of pRS415; Amp <sup>r</sup>              | This work |
| pRS415 P <sub>yhjX M2S3</sub> | P <sub>yhjX M2S3</sub> (replacement of bp 1,2,3,8,9 and 10 in M2) cloned in the EcoRI and BamHI sites of pRS415; Amp <sup>r</sup>          | This work |
| pBBR1-MCS5-TT-RBS- <i>lux</i> | <i>luxCDABE</i> and terminators lambda <i>T0 rmB1 T1</i> cloned into pBBR1-MCS5 for plasmid-based transcriptional fusions; Gm <sup>r</sup> | (6)       |
| pBBR <i>yhjX-lux</i>          | P <sub>yhjX -264/+36</sub> cloned in the BamHI and EcoRI sites of pBBR1-MCS5-TT-RBS- <i>lux</i> ; Gm <sup>r</sup>                          | This work |

---

TABLE S2. Oligonucleotides used in this study

| Oligonucleotide                       | # | Oligonucleotide Sequence (5'-3')                                                       | Description                                                                                             |
|---------------------------------------|---|----------------------------------------------------------------------------------------|---------------------------------------------------------------------------------------------------------|
| <b>Plasmid or strain construction</b> |   |                                                                                        |                                                                                                         |
| YpdB NdeI sense                       |   | AACATATGGTGAAAGTCATCATTGTTGAA                                                          | pBAD24- <i>ypdB</i>                                                                                     |
| YpdB XbaI antisense                   |   | CCTCTAGATTAAAGATGCATTAAGTGGCG                                                          | pBAD24- <i>ypdB</i> ,<br>pBAD24- <i>ypdAB</i>                                                           |
| ypdB B53E sense                       |   | GCCATTTTTCTGGAAATCAATATCCG                                                             | pBAD24- <i>ypdB</i> -D53E                                                                               |
| ypdB B53E antisense                   |   | CGGAATATTGATTTCCAGAAA AATGGC                                                           | pBAD24- <i>ypdB</i> -D53E                                                                               |
| ypdB D53N sense                       |   | ATAACCGCGTCGACGCCATTT TTCTGAATATCA<br>ATATTCCGTCGCTGG ATGGCG T                         | pBAD24- <i>ypdB</i> -D53N                                                                               |
| ypdB D53N anti                        |   | ACGCCATCCAGCGACGGAATATTGATATTCAGAAAAATGGCGTCGAC<br>GCGGTTAT                            | pBAD24- <i>ypdB</i> -D53N                                                                               |
| yehS NdeI sense                       |   | ATGCGCCATATGCTAAGTAACGATATTCTGC                                                        | pBAD24- <i>yehS</i>                                                                                     |
| yehS XbaI antisense                   |   | CTCTCTAGATTAGCCTTTTTTTCACATGCT                                                         | pBAD24- <i>yehS</i>                                                                                     |
| yhjX EcoRI sense                      |   | CAGGAGGAATTCATGACACCTTCAAATTATCAGC                                                     | pBAD24- <i>yhjX</i>                                                                                     |
| yhjX NdeI anti                        |   | GGAATTCATATGAAGGGAGCCATGCGCCTCACGCAAC                                                  | pBAD24- <i>yhjX</i>                                                                                     |
| YpdA EcoRI sense                      |   | CCGAATTCGTGCACGAAATATTCAACATG                                                          | pBAD24- <i>ypdA</i> ,<br>pBAD24- <i>ypdAB</i> ,<br>pBAD24- <i>ypdABC</i> ,<br>pBAD24- <i>ypdA</i> H371Q |
| YpdA NdeI antisense                   |   | AACATATGAAGCAATAACGTAGCCTGTGA                                                          | pBAD24- <i>ypdA</i> ,<br>pBAD24- <i>ypdA</i> H371Q                                                      |
| YpdC XbaI antisense                   |   | CCTCTAGATTAGCCTGAAAACGGGCGCT                                                           | pBAD24- <i>ypdABC</i>                                                                                   |
| ypdA H371Q sense                      |   | TCGCGCCCTGCAAAGCAAATAATCCCCAGTTTCTGTTAACGCTCT<br>GAACGCTATTTCA                         | pBAD24- <i>ypdA</i> H371Q                                                                               |
| ypdA H371Q anti                       |   | TGAAATAGCGTTCAGAGCGTTAAACAGAACTGGGGATTAATTTTGCT<br>TTGCAGGGCGCGA                       | pBAD24- <i>ypdA</i> H371Q                                                                               |
| pBAD24 anti                           |   | CAAATTCTGTTTTATCAGACCGCTTCTGCG                                                         | pBAD24 sequencing                                                                                       |
| pBAD24 sense                          |   | TCGCAACTCTACTGTTTCTCCATA                                                               | pBAD24 sequencing                                                                                       |
| rev24                                 |   | TTCACACAGGAAACAGCTATGACC                                                               | pUC19 sequencing,<br>labeling EMSA                                                                      |
| uni24                                 |   | ACGACGTTGTAACGACG                                                                      | pUC19 sequencing                                                                                        |
| up yhjX 300bp BamHI sense             |   | AATCCGGATCCCTAACTCAGGCAGAAAATACCA                                                      | pBBR <i>yhjX</i> - <i>lux</i>                                                                           |
| up yhjX EcoRI anti                    |   | ATACCGGAATTCGGCAGTATTCCTGCAGTAATAAAAAG                                                 | pBBR <i>yhjX</i> - <i>lux</i>                                                                           |
| Up YpdA                               |   | AGCCTTCAGGTTACCTATCATAGAGGTTTAACTTATTCAGAGTCAC<br>CCAATTAACCTCACTAAAGGCGG              | <i>E. coli</i> MG20<br>construction                                                                     |
| Low YpdC                              |   | GATGCACAAAGTATCCTGACGCTGCTGGAAACAGAATTAACCTTCTGA<br>CGTAATACGACTCACTATAGGGCTCG         | <i>E. coli</i> MG20<br>construction                                                                     |
| YpdBC-rpsL-neo-up                     |   | AACAGGAACTGAGCTGGCTAATTAAGAGCACAGCCAGATGGAGATT<br>GTCGGCACCTTTGGGCTGGTGATGATGGCGGGATCG | <i>E. coli</i> MG21<br>construction                                                                     |
| YpdBC-rpsL-neo-down                   |   | GCAAGATGCACAAAGTATCCTGACGCTGCTGGAAACAGAATTAACCT<br>TCTGACGTCAGAAGAACTCGTCAAGAAGGCG     | <i>E. coli</i> MG21<br>construction                                                                     |
| RED-Kan anti                          |   | CGAGACTAGTGAGACGTGCTAC                                                                 | control primer                                                                                          |
| RED-Kan sense                         |   | TATCAGGACATAGCGTTGGCTACC                                                               | control primer                                                                                          |
| ypdB sense                            |   | CGTACTTAGCATGAGGCCTT                                                                   | control primer                                                                                          |
| ypdB +84 sense                        |   | TGTGAGCCTGATAGTTACACC                                                                  | control primer                                                                                          |
| ypdA +350 s                           |   | CCGGACCGTCCGAGCGACGCT                                                                  | control primer                                                                                          |
| ypdA +50 s                            |   | AGCCTTCAGGTTACCTATCAT                                                                  | control primer                                                                                          |
| ypdC + 50 a                           |   | GATGCACAAAGTATCCTGACG                                                                  | control primer                                                                                          |
| ypdC + 350 a                          |   | CGCACTGAACATCCGTTTGAG                                                                  | control primer                                                                                          |

|                      |                                                                                                              |                                           |
|----------------------|--------------------------------------------------------------------------------------------------------------|-------------------------------------------|
| down-ypdB-rpsl - D53 | CACGCGGTGATGAACACAATAAACGGTTTATGGGCGAACTGGCTGAT                                                              | <i>E. coli</i> MG 24 / MG 25 construction |
| up ypdA rpsl neo     | GTTTCAGAAGAACTCGTCAAGAAGGCG<br>AATGCTTATCTGCCTGTTCTTTCTCATCCGTATCCGCCTGTTTCGCGA<br>ACGGCCTGGTATGATGGCGGGATCG | <i>E. coli</i> MG23 construction          |
| down ypdA rpsl neo   | AATGTAAAACGCAATTTCCGTCCCCGGCTCCAGGCGGCGGATATGCA                                                              | control primer                            |
| ypdA sense           | GCCTCAGAAGAACTCGTCAAGAAGGCG<br>GTGCACGAAATATTCAACATG                                                         | control primer                            |
| ypdA anti            | TCAAAGCAATAACGTAGCCT                                                                                         | control primer                            |
| YpdA+up50bp sense    | AGCCTTCAGGTTACCTATCATAGAGGTTAATCCTTATTCAGAGTCAC<br>CCGTGCACGAAATATTCAACATG                                   | <i>E. coli</i> MG 23 construction         |
| YpdA-down50bp anti   | TGCCAGGAATTCGTCTTCAACAATGATGACTTTCACAATATCACTCCG<br>GCTCAAAGCAATAACGTAGCCTGT                                 | <i>E. coli</i> MG 23 construction         |
| YpdB+up50bp sense    | ACCCAGTCGCCTCACAGGCTACGTTATTGCTTTGAGCCGGAGTGAT<br>ATTGTGAAAGTCATCATTGTTGAAGA                                 | <i>E. coli</i> MG 24 / MG 25 construction |
| YpdB-down50bp anti   | AAAAATTGTTGATCGGCGGGCAAGCCTGGTGCTTTCATGAAAGTTCC<br>CGATTAAGATGCATTAACCTGCGCAAAT                              | <i>E. coli</i> MG 24 / MG 25 construction |
| up yhjX              | TATGGTTGTCGGCAGAGATTTTTCTTTTTATTACTGCAGGAATACTG<br>CCAATTAACCCTCACTAAAGGGCG                                  | <i>E. coli</i> MG26 construction          |
| down yhjX            | ATGCGTTTGATGCACACGGAAGCTGAAGCCCAGTAGCTCGCGGCTG<br>AGCATAATACGACTCACTATAGGGCTC                                | <i>E. coli</i> MG26 construction          |
| yhjX-200             | GCAAAGGGAAAAAGTGTGGGGA                                                                                       | control primer                            |

---

### Northern Blot DNA probes

---

|            |                         |                   |
|------------|-------------------------|-------------------|
| cpxP anti  | CTACTGGGAACGTGAGTTGCT   | <i>cpxP</i> probe |
| cpxP sense | ATGCGCATAGTTACCGCTGCC   | <i>cpxP</i> probe |
| entC anti  | TTAATGCAATCCAAAAACGTT   | <i>entC</i> probe |
| entC sense | ATGGATACGTCACTGGCTGAG   | <i>entC</i> probe |
| entE anti  | TGCCAAACACCTGCTGCAACT   | <i>entE</i> probe |
| entE sense | ATGAGCATTCCATTCACCCGC   | <i>entE</i> probe |
| fecA anti  | GCAGGCTGTTGAAGGTGTGCA   | <i>fecA</i> probe |
| fecA sense | ATGACGCCGTTACGCTTTTT    | <i>fecA</i> probe |
| fecB anti  | TCATTTACAACGTAAGCGG     | <i>fecB</i> probe |
| fecB sense | ATGTTGGCATTATCCGTTTT    | <i>fecB</i> probe |
| fhuA anti  | GCAGTTCTGACGCACAGTAA    | <i>fhuA</i> probe |
| fhuA sense | ATGGCGCGTTCCAAAACGCT    | <i>fhuA</i> probe |
| fhuF anti  | TCATTTAGCGTACAATCGCC    | <i>fhuF</i> probe |
| fhuF sense | ATGGCCTATCGTCCGCACCG    | <i>fhuF</i> probe |
| guaC anti  | TTACAGGTTGTTGAAGATGCG   | <i>guaC</i> probe |
| guaC sense | ATGCGTATTGAAGAAGATCTG   | <i>guaC</i> probe |
| iraP anti  | TTACTGACGAGGATGCTTCAA   | <i>iraP</i> probe |
| iraP sense | ATGAAAAATCTCATTGCTGAG   | <i>iraP</i> probe |
| rpoD anti  | AATCGTCCAGGAAGCTACGCAGC | <i>rpoD</i> probe |
| rpoD sense | ATGGAGCAAAACCCGCACTCAC  | <i>rpoD</i> probe |
| yahM anti  | CTACGTAATCAACCTGATTTG   | <i>yahM</i> probe |
| yahM sense | ATGGCGGTCCAACTTTTCAA    | <i>yahM</i> probe |
| yehS anti  | TTAGCCTTTTTTACATGCTG    | <i>yehS</i> probe |
| yehS sense | ATGCTAAGTAACGATATTCTG   | <i>yehS</i> probe |
| ygbK anti  | TTACCCACGGCAGCCGGGAAAT  | <i>ygbK</i> probe |
| ygbK sense | ATGATCAAGATTGGCGTTATC   | <i>ygbK</i> probe |
| ygbL anti  | TTAACTCCTTAATTCGCAAT    | <i>ygbL</i> probe |
| ygbL sense | ATGAGCGATTTGCAAAAAGTA   | <i>ygbL</i> probe |
| yhjX anti  | CAAAGAACTCACTGACCAGTG   | <i>yhjX</i> probe |
| yhjX sense | ATGACACCTTCAAATTATCAG   | <i>yhjX</i> probe |
| yjiY anti  | TGATGAACAGGAACGGGAACA   | <i>yjiY</i> probe |
| yjiY sense | ATGGATACTAAAAAGATATTC   | <i>yjiY</i> probe |
| ynjH anti  | TTATGGCTTTACGCGCCGCCA   | <i>ynjH</i> probe |
| ynjH sense | GTGAGTCGAGCATTGTTCCGCC  | <i>ynjH</i> probe |
| ypdB anti  | TTAAAGATGCATTAACGTGGCG  | <i>ypdB</i> probe |

ypdB sense GTGAAAGTCATCATTGTTGAA ypdB probe

---

**EMSA/footprint**

---

|                 |                                 |                                                                                       |
|-----------------|---------------------------------|---------------------------------------------------------------------------------------|
| 6-FAM uni24     | [6-FAM]ACGACGTTGTA AACGACGGCCAG | EMSA labeling DNA-fragments                                                           |
| yhjX 1 sense    | TTGAATTCCTTCTGATGGCATTTCATG     | pUC19 P <sub>yhjX</sub> -64/+36                                                       |
| yhjX 1 anti     | TTGGATCCGGCAGTATTCCTGCAGTA      | pUC19 P <sub>yhjX</sub> -264/+36,<br>pRS415 P <sub>yhjX</sub> -264/+36 +<br>derivates |
| yhjX 2 sense    | TTGAATTCTAACAATAGTTGTGGCGA      | pUC19 P <sub>yhjX</sub> -164/-65                                                      |
| yhjX 2 anti     | TTGGATCCCGGAATGAAATGCCTTAG      | pUC19 P <sub>yhjX</sub> -164/-65                                                      |
| yhjX 3 sense    | TTGAATTCCTAACTCAGGCAGAAAAAT     | pUC19 P <sub>yhjX</sub> -264/-165,<br>pUC19 P <sub>yhjX</sub> -264/+36                |
| yhjX 3 anti     | TTGGATCC TTTAATGGTTTCAATTGT     | pUC19 P <sub>yhjX</sub> -264/-165                                                     |
| yjiY-5P-1 anti  | TTTTTTGGATCCAGTAAACCTGGCATGTA   | pUC19 P <sub>yjiY</sub> -212/+88                                                      |
| yjiY-5P-3 sense | TTTTTTGAATTCGCGCAGTGAATTTTATTCA | pUC19 P <sub>yjiY</sub> -212/+88                                                      |

---

**In vivo reporter**

---

|                                                                                                                                                                                                   |                                         |                                     |
|---------------------------------------------------------------------------------------------------------------------------------------------------------------------------------------------------|-----------------------------------------|-------------------------------------|
| upstream-replacement as upstream-replacement s motif 1                                                                                                                                            | GGCTGGACTTCCGTCATGACGCGACAATTATTC       | pRS415 P <sub>yhjX</sub> up_rplmt   |
| replacement as motif 1                                                                                                                                                                            | GACGGAAGTCCAGCCGGCATTTCATTCCGTTCT       | pRS415 P <sub>yhjX</sub> up_rplmt   |
| replacement s spacer                                                                                                                                                                              | CGTCCCGTAATTAGTTCAGGAATGAATG            | pRS415 P <sub>yhjX</sub> M1         |
| replacement as spacer                                                                                                                                                                             | TTACGGGACGTCCGTTCTGATGGCATT             | pRS415 P <sub>yhjX</sub> M1         |
| replacement s motif 2                                                                                                                                                                             | CRACTCCATTCATGAAATGCCTTAGTTCA           | pRS415 P <sub>yhjX</sub> spacer     |
| replacement as motif 2                                                                                                                                                                            | GAATGGAGTCGGGCATTCATGCCGTTTT            | pRS415 P <sub>yhjX</sub> spacer     |
| replacement s downstream-replacement as downstream-replacement s motif shortening 1 as motif shortening 2 as motif shortening 3 as motif shortening 1 s motif shortening 2 s motif shortening 3 s | CGTCCCGTAAATCAGAACGGAATGAAAT            | pRS415 P <sub>yhjX</sub> M2         |
|                                                                                                                                                                                                   | TTACGGGACGGCCGTTTTTCCCCAGGCA            | pRS415 P <sub>yhjX</sub> M2         |
|                                                                                                                                                                                                   | AGTTTTCCCCATTAATGAAATGCCATCAGAAC        | pRS415 P <sub>yhjX</sub> down_rplmt |
|                                                                                                                                                                                                   | TAATGGGGGAAAACGCATAAAGTGCACCTTCGT       | pRS415 P <sub>yhjX</sub> down_rplmt |
|                                                                                                                                                                                                   | ATCAGAACGGACTGAAATGCATTAGTTCAGGAATGAATG | pRS415 P <sub>yhjX</sub> M2 G/T     |
|                                                                                                                                                                                                   | ATCAGAACGGACGGAAATGAATTAGTTCAGGAATGAATG | pRS415 P <sub>yhjX</sub> M2 GG/AT   |
|                                                                                                                                                                                                   | ATCAGAACGGACGTAAATTAATTAGTTCAGGAATGAATG | pRS415 P <sub>yhjX</sub> M2 GGC/CAT |
|                                                                                                                                                                                                   | TCCGTTCTGATTGCATTCAGGCCGTTTTTCCCCAGGCA  | pRS415 P <sub>yhjX</sub> M2 G/T     |
|                                                                                                                                                                                                   | TCCGTTCTGATTCATTCAGGCCGTTTTTCCCCAGGCA   | pRS415 P <sub>yhjX</sub> M2 GG/AT   |
|                                                                                                                                                                                                   | TCCGTTCTGATTTAATTTACGGCCGTTTTTCCCCAGGCA | pRS415 P <sub>yhjX</sub> M2 GGC/CAT |

---

TABLE S3: Influence of C-sources and additives on *yhjX* expression. Strain and cultivation conditions were the same as described in Figure 4B.

| Medium    | Additional C-source  | Concentration C-source | Additive                  | Concentration additive | Average of max. <i>yhjX</i> expression [RLU/OD <sub>600</sub> ] | Standard deviation of max. <i>yhjX</i> expression [RLU/OD <sub>600</sub> ] |
|-----------|----------------------|------------------------|---------------------------|------------------------|-----------------------------------------------------------------|----------------------------------------------------------------------------|
| LB medium | Glucose              | 0.4%                   | Pyruvate                  | 20 mM                  | 41,710                                                          | 3,020                                                                      |
| LB medium | Pyruvate             | 20 mM                  |                           |                        | 38,810                                                          | 1,270                                                                      |
| LB medium | -                    | -                      | -                         | -                      | 35,450                                                          | 3,670                                                                      |
| LB medium | Glucose              | 0.4%                   | -                         | -                      | 10,820                                                          | 1,910                                                                      |
| M9 medium | Pyruvate             | 20 mM                  | -                         | -                      | 479,070                                                         | 46,060                                                                     |
| M9 medium | Yeast extract        | 0.5%                   | -                         | -                      | 38,240                                                          | 4,460                                                                      |
| M9 medium | Gluconic acid        | 0.4%                   | -                         | -                      | 7,260                                                           | 620                                                                        |
| M9 medium | Glucuronic acid      | 0.4%                   | -                         | -                      | 4,120                                                           | 860                                                                        |
| M9 medium | Lactate              | 20 mM                  | -                         | -                      | 1,000                                                           | 160                                                                        |
| M9 medium | Phosphoenol pyruvate | 20 mM                  | -                         | -                      | 370                                                             | 80                                                                         |
| M9 medium | Glycerol             | 0.4%                   | -                         | -                      | 360                                                             | 70                                                                         |
| M9 medium | L-Serine             | 20 mM                  | -                         | -                      | 360                                                             | 50                                                                         |
| M9 medium | Acetate              | 0.4%                   | -                         | -                      | 320                                                             | 30                                                                         |
| M9 medium | Lactose              | 0.4%                   | -                         | -                      | 300                                                             | 20                                                                         |
| M9 medium | Casamino acids       | 0.4%                   | -                         | -                      | 260                                                             | 30                                                                         |
| M9 medium | L-Proline            | 20 mM                  | -                         | -                      | 260                                                             | 40                                                                         |
| M9 medium | Fumarate             | 20 mM                  | -                         | -                      | 250                                                             | 50                                                                         |
| M9 medium | Mannose              | 0.4%                   | -                         | -                      | 250                                                             | 50                                                                         |
| M9 medium | Succinate            | 0.4%                   | -                         | -                      | 250                                                             | 40                                                                         |
| M9 medium | Galactose            | 0.4%                   | -                         | -                      | 230                                                             | 30                                                                         |
| M9 medium | Oxaloacetate         | 20 mM                  | -                         | -                      | 230                                                             | 30                                                                         |
| M9 medium | Peptone              | 0.4%                   | -                         | -                      | 220                                                             | 60                                                                         |
| M9 medium | L-Aspartate          | 20 mM                  | -                         | -                      | 210                                                             | 40                                                                         |
| M9 medium | Mannitol             | 0.4%                   | -                         | -                      | 210                                                             | 40                                                                         |
| M9 medium | Fructose             | 0.4%                   | -                         | -                      | 200                                                             | 40                                                                         |
| M9 medium | Xylose               | 0.4%                   | -                         | -                      | 200                                                             | 50                                                                         |
| M9 medium | Maltose              | 0.4%                   | -                         | -                      | 170                                                             | 40                                                                         |
| M9 medium | Glucose              | 0.4%                   | -                         | -                      | 160                                                             | 150                                                                        |
| M9 medium | L-Glutamate          | 0.4%                   | -                         | -                      | 130                                                             | 40                                                                         |
| M9 medium | Tryptone             | 0.4%                   | -                         | -                      | 10                                                              | 10                                                                         |
| M9 medium | Cas amino acids      | 0.4%                   | Glucose                   | 0.4%                   | 22,640                                                          | 520                                                                        |
| M9 medium | Cas amino acids      | 1.5%                   | PIPES (pH 5.5) + Glycerol | 20 mM + 0.8%           | 9,910                                                           | 720                                                                        |
| M9 medium | Cas amino acids      | 1.5%                   | PIPES (pH 7.0) + Glycerol | 20 mM + 0.8%           | 7,620                                                           | 240                                                                        |
| M9 medium | Pyruvate             | 20 mM                  | Fumarate                  | 20 mM                  | 528,780                                                         | 66,840                                                                     |
| M9 medium | Pyruvate             | 20 mM                  | Glucose                   | 20 mM                  | 281,270                                                         | 28,830                                                                     |
| M9 medium | Pyruvate             | 20 mM                  | Glucose                   | 1 mM                   | 270,880                                                         | 41,130                                                                     |

|           |           |       |                                 |               |         |        |
|-----------|-----------|-------|---------------------------------|---------------|---------|--------|
| M9 medium | Pyruvate  | 20 mM | Lactate + PIPES (pH 7.0)        | 20 mM + 20 mM | 240,000 | 16,200 |
| M9 medium | Pyruvate  | 20 mM | Glucose                         | 5 mM          | 201,370 | 6,160  |
| M9 medium | Pyruvate  | 20 mM | Acetate                         | 20 mM         | 165,180 | 20,310 |
| M9 medium | Succinate | 0.4%  | Pyruvate                        | 20 mM         | 274,060 | 17,380 |
| M9 medium | Succinate | 0.4%  | Fumarate                        | 20 mM         | 9,940   | 1,130  |
| M9 medium | Succinate | 0.4%  | Lactose                         | 0.4%          | 3,350   | 790    |
| M9 medium | Succinate | 0.4%  | Guanidine hydrochloride         | 1 mg/ml       | 660     | 390    |
| M9 medium | Succinate | 0.4%  | Methanol                        | 1%            | 600     | 480    |
| M9 medium | Succinate | 0.4%  | Fosfomycin                      | 1 µg/ml       | 570     | 480    |
| M9 medium | Succinate | 0.4%  | Crystal violet                  | 0.05 µg/µl    | 560     | 450    |
| M9 medium | Succinate | 0.4%  | D-Leucine                       | 20 mM         | 540     | 40     |
| M9 medium | Succinate | 0.4%  | L-Histidine                     | 20 mM         | 530     | 380    |
| M9 medium | Succinate | 0.4%  | Sulfamethazine                  | 0.5 µg/ml     | 510     | 30     |
| M9 medium | Succinate | 0.4%  | Arsenate                        | 20 µg/ml      | 500     | 190    |
| M9 medium | Succinate | 0.4%  | Imipenem                        | 0.05 µg/ml    | 480     | 210    |
| M9 medium | Succinate | 0.4%  | Plumbagin                       | 8 µg/ml       | 470     | 240    |
| M9 medium | Succinate | 0.4%  | D-Argine                        | 20 mM         | 410     | 430    |
| M9 medium | Succinate | 0.4%  | D-Proline                       | 20 mM         | 410     | 180    |
| M9 medium | Succinate | 0.4%  | Maltose                         | 0.4%          | 390     | 60     |
| M9 medium | Succinate | 0.4%  | Xylose                          | 0.4%          | 380     | 50     |
| M9 medium | Succinate | 0.4%  | Antimony(III)chloride           | 5 µg/ml       | 370     | 140    |
| M9 medium | Succinate | 0.4%  | Hydroxyurea                     | 100 µg/ml     | 350     | 200    |
| M9 medium | Succinate | 0.4%  | Paromomycin                     | 0.01 µg/ml    | 350     | 150    |
| M9 medium | Succinate | 0.4%  | Paromomycin                     | 0.005 µg/ml   | 340     | 130    |
| M9 medium | Succinate | 0.4%  | 5,7-Dichloro-8-hydroxyquinoline | 1 µg/ml       | 330     | 360    |
| M9 medium | Succinate | 0.4%  | D-Tyrosine                      | 20 mM         | 330     | 110    |
| M9 medium | Succinate | 0.4%  | Oxalate                         | 30 mM         | 330     | 220    |
| M9 medium | Succinate | 0.4%  | Propanol                        | 1%            | 330     | 330    |
| M9 medium | Succinate | 0.4%  | Thiamphenicol                   | 1 µg/ml       | 300     | 160    |
| M9 medium | Succinate | 0.4%  | Polymyxin B                     | 0.005µg/ml    | 290     | 130    |
| M9 medium | Succinate | 0.4%  | Deoxycholate                    | 100 µg/ml     | 280     | 340    |
| M9 medium | Succinate | 0.4%  | Lactulose                       | 30 mM         | 280     | 250    |
| M9 medium | Succinate | 0.4%  | Natriumphosphat (pH 7)          | 200 mM        | 280     | 250    |
| M9 medium | Succinate | 0.4%  | Hydroxycoumarin                 | 10µg/ml       | 270     | 220    |
| M9 medium | Succinate | 0.4%  | Tobramycin                      | 0.01 µg/ml    | 270     | 460    |
| M9 medium | Succinate | 0.4%  | Arsenite                        | 10 µg/ml      | 260     | 10     |
| M9 medium | Succinate | 0.4%  | L-Alanine                       | 20 mM         | 260     | 60     |
| M9 medium | Succinate | 0.4%  | Iodacetic acid                  | 10 µg/ml      | 250     | 240    |
| M9 medium | Succinate | 0.4%  | L-Leucine                       | 20 mM         | 240     | 230    |
| M9 medium | Succinate | 0.4%  | Lactate                         | 20 mM         | 230     | 90     |
| M9 medium | Succinate | 0.4%  | Deoxycholate                    | 50 µg/ml      | 210     | 220    |
| M9 medium | Succinate | 0.4%  | L-Arginine                      | 20 mM         | 210     | 180    |
| M9 medium | Succinate | 0.4%  | L-Isoleucine                    | 20 mM         | 200     | 40     |
| M9 medium | Succinate | 0.4%  | L-Tyrosine                      | 20 mM         | 200     | 190    |



|           |           |      |                               |                      |     |     |
|-----------|-----------|------|-------------------------------|----------------------|-----|-----|
| M9 medium | Succinate | 0.4% | N-Acetyl-Glucosamine          | 0.4%                 | 170 | 40  |
| M9 medium | Succinate | 0.4% | Deoxycholate                  | 500 µg/ml            | 160 | 280 |
| M9 medium | Succinate | 0.4% | NaCl                          | 2%                   | 160 | 40  |
| M9 medium | Succinate | 0.4% | PIPES (pH 7.0) + Oxalate      | 20 mM + 30 mM        | 160 | 40  |
| M9 medium | Succinate | 0.4% | Apramycin                     | 0.005 µg/ml          | 150 | 140 |
| M9 medium | Succinate | 0.4% | Benzoate                      | 30 mM                | 140 | 120 |
| M9 medium | Succinate | 0.4% | Ethanol                       | 5%                   | 130 | 230 |
| M9 medium | Succinate | 0.4% | Peptidoglycan E. coli         | 1/20 fold dilution   | 130 | 100 |
| M9 medium | Succinate | 0.4% | PIPES (pH 7.0) + Mitomycin    | 20 mM + 0.3 µg/ml    | 130 | 30  |
| M9 medium | Succinate | 0.4% | D-Cycloserine                 | 0,5 µg/ml            | 120 | 190 |
| M9 medium | Succinate | 0.4% | D-Serine                      | 20 mM                | 120 | 110 |
| M9 medium | Succinate | 0.4% | Ethanol                       | 1%                   | 120 | 200 |
| M9 medium | Succinate | 0.4% | Gly-Gly                       | 20 mM                | 100 | 300 |
| M9 medium | Succinate | 0.4% | L-Asparagine                  | 20 mM                | 100 | 140 |
| M9 medium | Succinate | 0.4% | L-Threonine                   | 20 mM                | 100 | 180 |
| M9 medium | Succinate | 0.4% | PIPES (pH 7.0)                | 20 mM                | 90  | 20  |
| M9 medium | Succinate | 0.4% | D-Alanine                     | 20 mM                | 80  | 130 |
| M9 medium | Succinate | 0.4% | L-Glutamate                   | 20 mM                | 80  | 130 |
| M9 medium | Succinate | 0.4% | L-Proline                     | 20 mM                | 80  | 140 |
| M9 medium | Succinate | 0.4% | Chlorambucil                  | 50 µg/ml             | 70  | 120 |
| M9 medium | Succinate | 0.4% | Ethanol                       | 2%                   | 70  | 110 |
| M9 medium | Succinate | 0.4% | L-Glycine                     | 20 mM                | 70  | 120 |
| M9 medium | Succinate | 0.4% | Phenyl-methylsulfonyl-fluorid | 200 µg/ml            | 60  | 110 |
| M9 medium | Succinate | 0.4% | PIPES (pH 7.0) + Formate      | 20 mM + 30 mM        | 60  | 20  |
| M9 medium | Succinate | 0.4% | L-Serine                      | 20 mM                | 50  | 80  |
| M9 medium | Succinate | 0.4% | Peptidoglycan Bacillus        | 1/20 fold dilution   | 50  | 30  |
| M9 medium | Succinate | 0.4% | Peptidoglycan Lactobacillus   | 1/20 fold dilution   | 50  | 90  |
| M9 medium | Succinate | 0.4% | Amitriptylin                  | 10 µg/ml             | 40  | 40  |
| M9 medium | Succinate | 0.4% | Formate                       | 30 mM                | 40  | 70  |
| M9 medium | Succinate | 0.4% | L-Aspartate                   | 20 mM                | 40  | 30  |
| M9 medium | Succinate | 0.4% | Methylglyoxal                 | 0,7 mM               | 40  | 10  |
| M9 medium | Succinate | 0.4% | Peptidoglycan Lactobacillus   | 1/2000 fold dilution | 40  | 20  |
| M9 medium | Succinate | 0.4% | D-Ala-D-Ala                   | 20 mM                | 30  | 20  |
| M9 medium | Succinate | 0.4% | Dulcitol                      | 0.4%                 | 30  | 50  |
| M9 medium | Succinate | 0.4% | Methylglyoxal                 | 0,2 mM               | 30  | 10  |
| M9 medium | Succinate | 0.4% | Peptidoglycan Bacillus        | 1/2000 fold dilution | 30  | 40  |
| M9 medium | Succinate | 0.4% | PIPES (pH 7.0) + Benzoate     | 20 mM + 30 mM        | 20  | 10  |

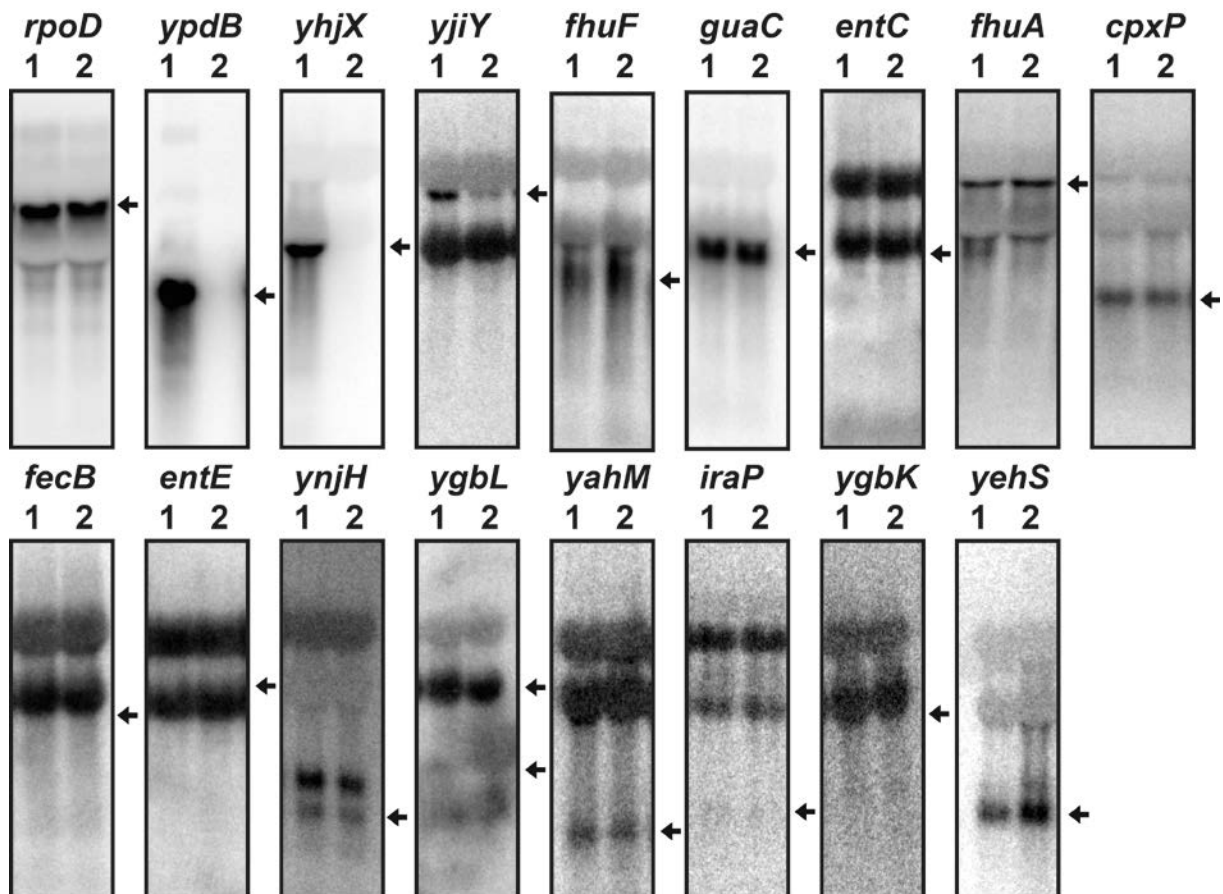

FIG. S1. Evaluation of potential YpdB target genes. A) Northern blot analysis was used to measure the effect of overproduction of YpdB on the expression of the genes identified by transcriptome analysis (see Table 1) and *rpoD* (control) in *E. coli* MG21 ( $\Delta ypdB$ ). The expression levels of these genes were also assessed in the *E. coli* strain MG21 ( $\Delta ypdB$ ) in the absence of YpdB (*E. coli* MG21 transformed with the empty pBAD24 vector) (lanes 2) or upon overproduction of YpdB (lanes 1). 20  $\mu$ g of total RNA was loaded per lane, and the transcripts were detected with the corresponding gene-specific DNA probes. Transcripts of the corresponding genes are marked by an arrow.

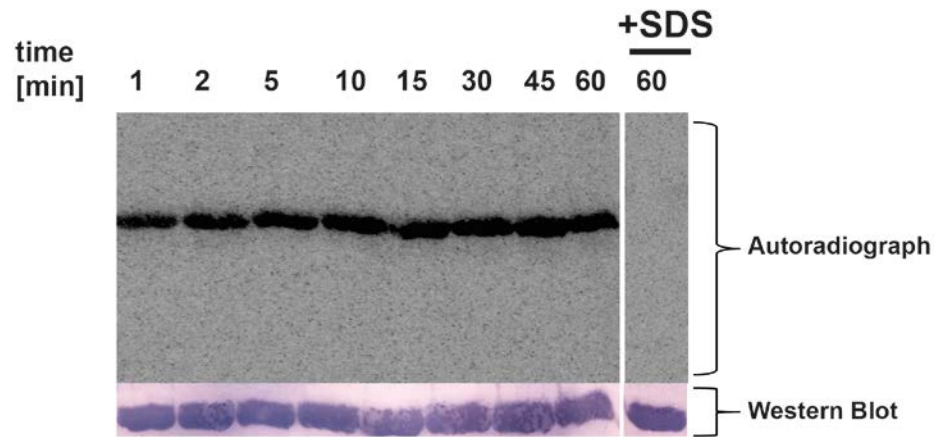

Fig. S2. In vitro phosphorylation of YpdB. Purified YpdB-6His was mixed with phosphorylation buffer. Phosphorylation was started by adding a mixture of  $[\gamma\text{-}^{32}\text{P}]\text{acetyl phosphate}$  and  $\text{MgCl}_2$ . At the indicated times, the reaction was stopped by adding SDS-sample buffer, the samples were subjected to SDS-PAGE and Semi Dry Western Blotting. As negative control, protein was denatured by adding SDS-sample before the reaction was started (+SDS). Phosphorylated YpdB was detected by autoradiography using a phosphor screen and a PhosphorImager Storm. The autoradiograph is representative of three independent experiments.

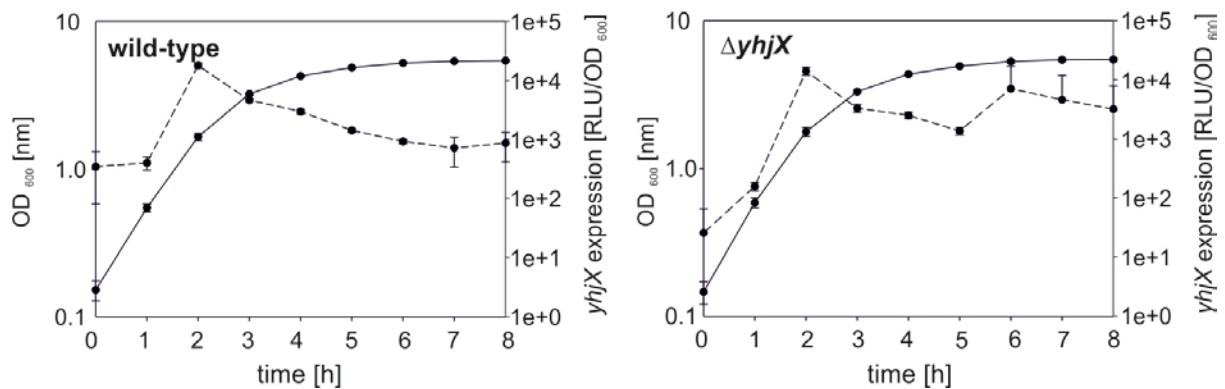

Fig. S3. *yhjX* induction is independent of YhjX feedback regulation. *Escherichia coli* MG1665 (wild-type) and MG26 ( $\Delta yhjX$ ) were transformed with pBBR *yhjX*-lux and grown aerobically in LB medium. Growth and luciferase activity were monitored continuously. The maximal luciferase activity normalized to an optical density of 1 (RLU/OD<sub>600</sub>) was used as a measure of the degree of induction of *yhjX*. Data were obtained from at least three independent experiments, and average values were used for calculations.

#### References:

1. **Cherepanov PP, Wackernagel W.** 1995. Gene disruption in *Escherichia coli*: TcR and KmR cassettes with the option of Flp-catalyzed excision of the antibiotic-resistance determinant. *Gene* **158**:9-14.
2. **Guzman L, Belin D, Carson M, Beckwith J.** 1995. Tight regulation, modulation, and high-level expression by vectors containing the arabinose PBAD promoter. *J. Bacteriol.* **177**:4121-4130.
3. **Yanisch-Perron C, Vieira J, Messing J.** 1985. Improved M13 phage cloning vectors and host strains: nucleotide sequences of the M13mp18 and pUC19 vectors. *Gene* **33**:103 - 119.
4. **Kraxenberger T, Fried L, Behr S, Jung K.** 2012. First insights into the unexplored two-component system YehU/YehT in *Escherichia coli*. *J. Bacteriol.* **194**:4272-4284.
5. **Simons R, Houman F, Kleckner N.** 1987. Improved single and multicopy lac-based cloning vectors for protein and operon fusions. *Gene* **53**:85-96.
6. **Godeke J, Heun M, Bubendorfer S, Paul K, Thormann KM.** 2011. Roles of Two *Shewanella oneidensis* MR-1 Extracellular Endonucleases. *Appl Environ Microbiol* **77**:5342-5351.
